# Supplementary material
Source: publisher figshare collection journal article supplement (https://springernature.figshare.com/ndownloader/files/14014043)
Supplement: Supplementary file [file 14014043]

Unweighted UniFrac distance metric

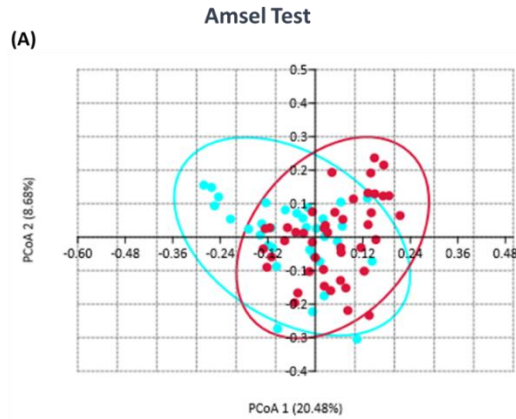

(B)

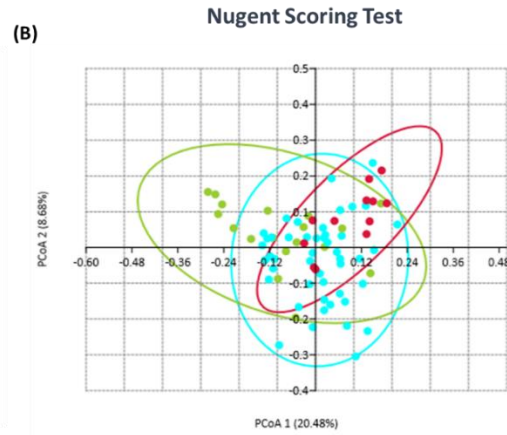

Weighted UniFrac distance metric

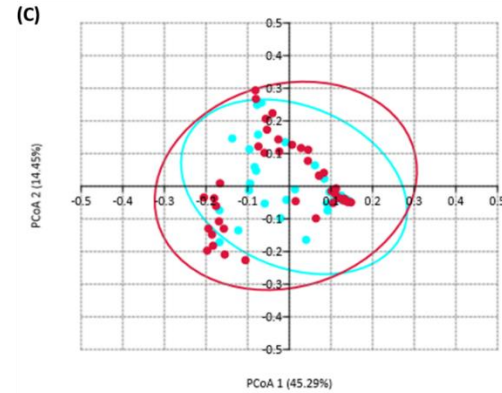

(D)

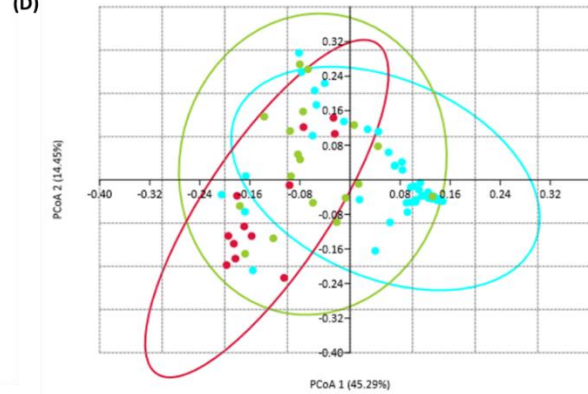

Bray-Curtis distance

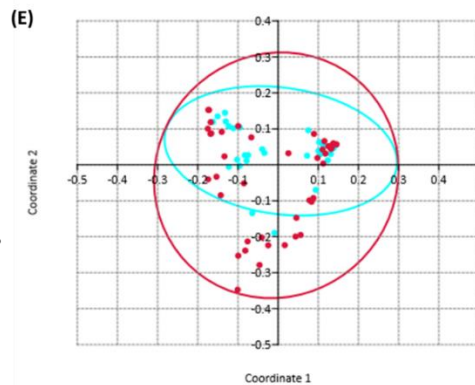

(F)

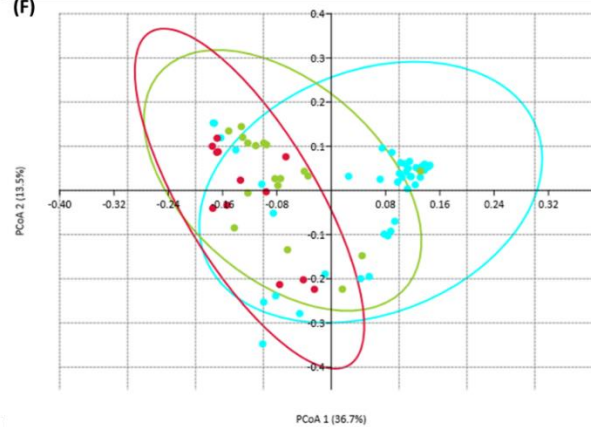

## Figure S4. Principal coordinate analysis (PCoA) plots of vaginal bacterial communities.

The PCoA plots were generated by the unweighted UniFrac distance, weighted UniFrac distance, and Bray-Curtis distance. The x- and y-axes are indicated by the first and second coordinates, respectively, and the values in parentheses show the percentages of the community variation. The red dots represent BV-positive women. The blue dots represent BV-negative women. The green dots represent women with “intermedia flora” using the Nugent score test.
